# Supplementary material for: Heavy Ion-Responsive lncRNA EBLN3P Functions in the Radiosensitization of Non-Small Cell Lung Cancer Cells Mediated by TNPO1
Source: MDPI journal article supplement (doi:10.3390/cancers15020511), 2023-01-13
Supplement: s1 [file s1]

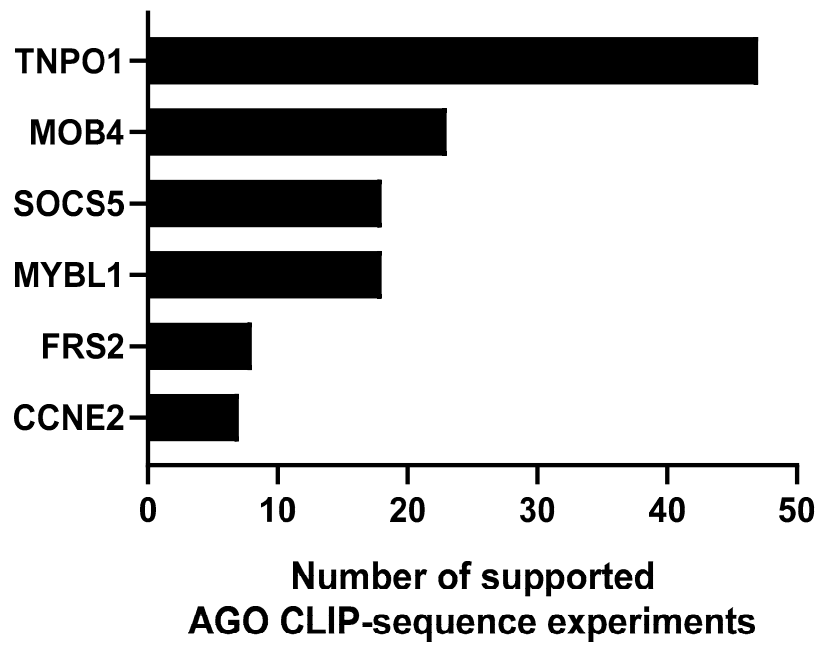

**Figure S1.** Number of the reported AGO-CLIP experiments was analyzed to predict the interaction between miR-144-3p and its target genes. Data are from ENCORI database (<https://starbase.sysu.edu.cn/>).

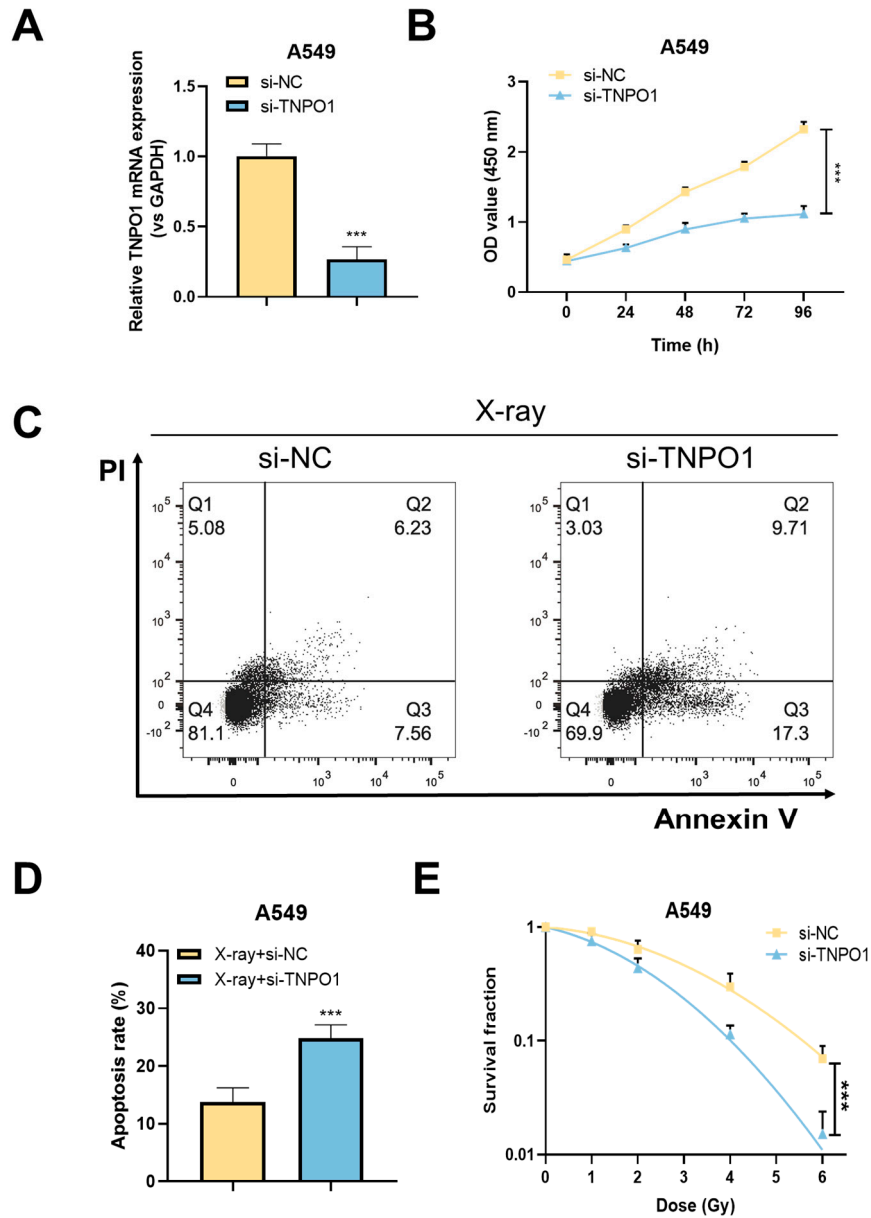

**Figure S2.** TNPO1-knockdown inhibited proliferation of A549 cells and sensitized the cells to X-ray irradiation. (A) The relative expression of TNPO1 in the cells transfected by si-TNPO1 was verified by qRT-PCR. (B) The cell viability of A549 cells with TNPO1-knockdown was detected by CCK-8 assay. (C-D) The apoptosis rate of A549 cells with TNPO1-knockdown after exposure to X-ray irradiation. (E) The survival fraction of A549 cells with TNPO1-knockdown was determined by colony formation assay. \*\*\* $p < 0.001$ .

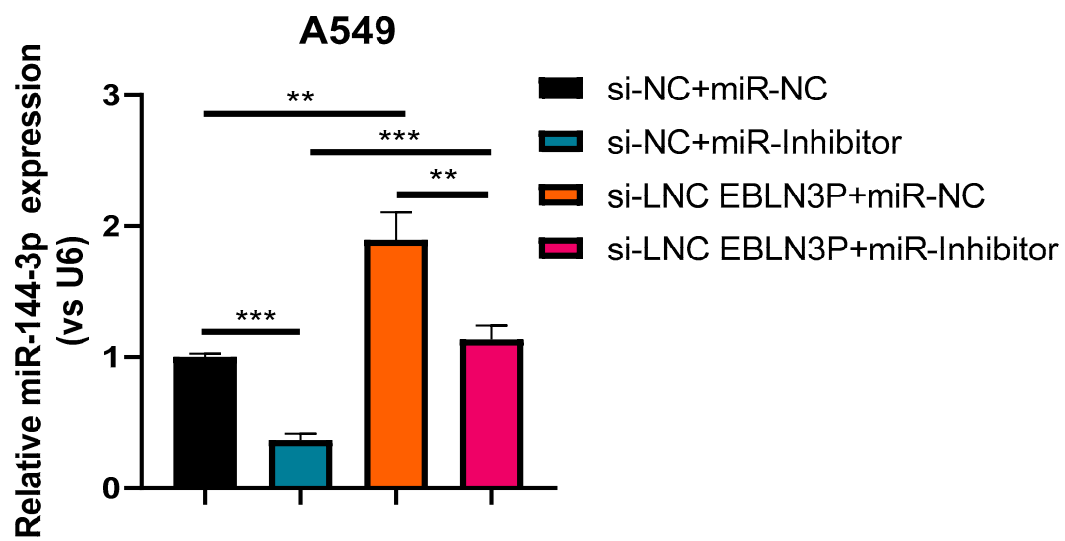

**Figure S3.** The relative expression of miR-144-3p in A549 cells co-transfected with si-LNC EBLN3P and miR-Inhibitors was determined by qRT-PCR.  $**p < 0.01$ ,  $***p < 0.001$ .

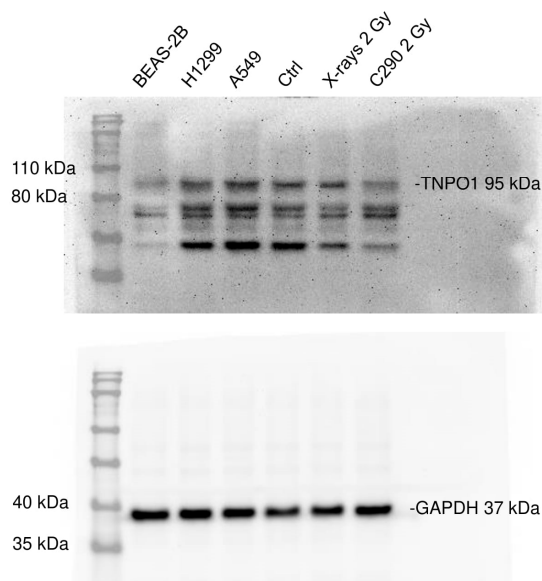

**Figure S4:** The whole blot image of the western blotting data of Figure 2.

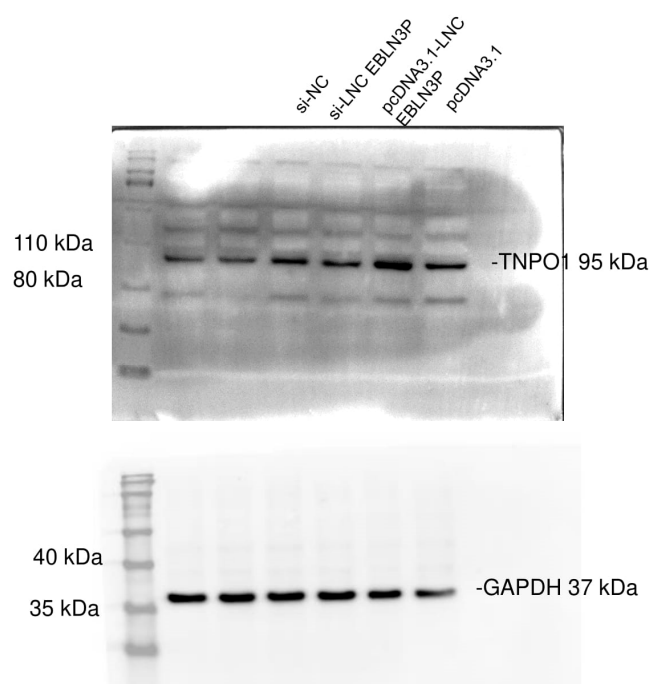

**Figure S5:** The whole blot image of the western blotting data of Figure 4.
